# Supplementary material
Source: HighWire-hosted journal article supplement (https://erj.ersjournals.com/content/49/3/1601740)
Supplement: inline-supplementary-material-2 [file inline-supplementary-material-2.xlsx]

## Sheet: Table_E3
Table E3. Full metabolomics data set.
		Fold change (95% CIs)				Univariate		Correlation with inhaled corticosteroid dose			Pairwise Comparisons (Tukey hsd)
CAS-ID	Compound	Control	Mild	Moderate	Severe	p-value	q-value	rho	p-value	RSD of QC(%)	Control vs Mild	Control vs Moderate	Control vs Severe	Mild vs Moderate	Mild vs Severe	Moderate vs Severe
71030-37-0	12-HETE	1 (0.36,2.7)	0.76 (0.29,1.78)	1.13 (0.49,4.34)	0.86 (0.36,2.14)	0.660715	0.776692	-0.0821314	0.619144	6.20306
	22-hydroxycholesterol	1 (0.8,1.26)	1.33 (1.04,1.6)	1.07 (0.86,1.33)	1.34 (1.02,1.66)	0.00182639	0.0301355	0.296373	0.0566745	8.37168	0.0767266	0.948455	0.0736509	0.0135935	0.979435	0.0179385
30315-93-6	Asymmetric dimethylarginine	1 (0.74,1.32)	0.72 (0.49,0.96)	0.81 (0.61,1.11)	1.11 (0.68,1.69)	0.177317	0.433441	0.246512	0.115543	5.67363
463-40-1	alpha-Linolenate	0.99 (0.73,1.35)	1.67 (1.23,2.22)	1.13 (0.92,1.63)	1.22 (0.96,1.81)	0.00956008	0.0691431	-0.0587324	0.711784	7.35651	0.933234	0.44819	0.201909	0.143597	0.446833	0.0058431
506-32-1	Arachidonic acid	1.01 (0.74,1.38)	0.99 (0.75,1.49)	1.14 (0.75,1.47)	1.06 (0.76,1.55)	0.870103	0.897293	-0.105965	0.504204	9.50434
86288-11-1	Arachidonoyl Platelet activating factor(C16:0)	1 (0.85,1.17)	1.05 (0.89,1.27)	0.96 (0.78,1.15)	0.91 (0.75,1.13)	0.613	0.749222	0.129786	0.412672	7.52817
7200-25-1	Arginine	1 (0.85,1.19)	0.96 (0.72,1.19)	1.1 (0.97,1.28)	1.17 (1.05,1.35)	0.0268695	0.126671	0.273372	0.0798203	6.34671	0.692443	0.654315	0.317637	0.0962964	0.036549	0.878562
13433-09-5	Aspartylphenylalanine	1 (0.64,1.51)	0.96 (0.58,1.55)	1.14 (0.8,1.53)	1.35 (0.91,2.03)	0.0995187	0.290965	0.158454	0.316218	12.9805
635-65-4	Bilirubin	1 (0.64,1.55)	0.91 (0.64,1.4)	0.79 (0.53,1.21)	0.64 (0.47,1.04)	0.0772409	0.268311	0.0957789	0.546259	4.75598
58-08-02	Caffeine	0.97 (0.19,4.71)	0.79 (0.35,5.31)	1.65 (0.66,10.96)	1.23 (0.67,6.03)	0.287538	0.572149	-0.0515038	0.745995	15.4261
17298-37-2	Propionylcarnitine	1 (0.71,1.39)	0.78 (0.46,1.07)	0.91 (0.61,1.19)	0.97 (0.65,1.44)	0.301613	0.572149	0.036718	0.817426	8.94769
25243-95-2	Octanoylcarnitine	1 (0.62,1.68)	0.94 (0.59,1.58)	0.93 (0.62,1.49)	1.45 (0.85,2.14)	0.343184	0.580773	0.0762289	0.631363	6.17916
372-75-8	Citrulline	0.99 (0.78,1.27)	0.95 (0.74,1.15)	0.93 (0.75,1.13)	1.09 (0.87,1.28)	0.413674	0.628315	0.168147	0.287133	10.9727
50-23-7	Cortisol	1.02 (0.74,1.37)	1.06 (0.76,1.43)	0.99 (0.72,1.46)	0.61 (0.41,0.95)	0.0246584	0.125189	-0.426924	0.00537376	6.97582	0.0654915	0.99989	0.993719	0.0669815	0.0784919	0.988202
53-06-05	Cortisone	1 (0.85,1.19)	0.99 (0.84,1.26)	0.91 (0.79,1.17)	0.62 (0.53,0.8)	0.00023471	0.00774544	-0.444157	0.00362475	15.0638	0.00875386	0.939931	0.900539	0.000797582	0.00349886	0.996764
111-20-6	Decanedioic acid	1 (0.82,1.25)	1.08 (0.88,1.26)	1 (0.81,1.11)	1.01 (0.83,1.13)	0.612698	0.749222	-0.0230822	0.884636	7.63079
19794-97-9	dehydro-Sphingosine-1-phosphate(d18:0)	1 (0.82,1.2)	0.96 (0.77,1.25)	1.15 (0.92,1.39)	1.27 (1.05,1.57)	0.0618551	0.227602	0.121079	0.444976	10.6314
764-22-7	dehydro-Sphingosine-1-Phosphate(d18:0)	1 (0.57,1.64)	1.16 (0.7,1.79)	1.07 (0.74,1.72)	1.5 (0.9,2.39)	0.336587	0.580773	0.250726	0.12367	6.50178
6217-54-5	Docosahexaenoic acid	1.01 (0.63,1.51)	0.96 (0.64,1.54)	0.86 (0.59,1.15)	0.99 (0.69,1.32)	0.534057	0.691132	0.101693	0.521638	7.891
651-48-9	Dehydroepiandrosterone-Sulfate	1 (0.69,1.45)	0.91 (0.61,1.46)	0.57 (0.39,0.97)	0.23 (0.14,0.32)	2 x 10-7	1 x 10-5	-0.663224	1.7 x 10-6	4.52609	0.00817497	0.179809	0.38343	6 x 10-7	8 x 10-5	0.999361
693-23-2	Dodecanedioic acid	1 (0.58,1.75)	0.82 (0.54,1.35)	0.91 (0.56,1.38)	0.98 (0.6,1.35)	0.455968	0.667148	0.19401	0.27932	4.74562
56-85-9	Glutamine	1 (0.9,1.11)	0.92 (0.8,1.03)	1.02 (0.93,1.12)	0.98 (0.84,1.1)	0.14885	0.377851	-0.068261	0.667536	13.8936
56-86-0	Glutamate	0.97 (0.62,1.6)	0.94 (0.68,1.39)	0.95 (0.68,1.41)	1.2 (0.87,1.68)	0.297054	0.572149	0.138658	0.381179	13.7897
475-31-0	Glycocholate	1 (0.44,2.19)	1.66 (0.62,2.99)	0.94 (0.43,2.55)	1.32 (0.65,2.29)	0.756374	0.818372	-0.116859	0.466846	7.35069
118-00-3	Guanosine	1 (0.4,2.4)	1.45 (0.33,4.26)	1.56 (0.74,3.91)	1.45 (0.83,3.53)	0.265567	0.572149	0.132806	0.413969	23.8034
	Hexosylceramide(C16:0)	1 (0.59,1.74)	1.17 (0.78,1.75)	1.03 (0.67,1.54)	1.09 (0.7,1.59)	0.77532	0.825341	0.106622	0.501549	7.01371
71-00-1	Histidine	1 (0.91,1.1)	0.96 (0.86,1.03)	1 (0.87,1.08)	0.95 (0.85,1.07)	0.32075	0.572149	-0.0521609	0.742864	6.00978
542813-14-9	HWESASXX	1 (0.63,1.6)	1.3 (0.82,1.87)	1.2 (0.78,1.78)	1.19 (0.83,1.83)	0.509597	0.672668	0.0583179	0.72076	22.4629
68-94-0	Hypoxanthine	1 (0.84,1.2)	1.1 (0.85,1.38)	1.15 (0.89,1.48)	1.15 (0.94,1.45)	0.418877	0.628315	0.0749967	0.636904	9.431
87-51-4	Indole-3-acetate	1 (0.7,1.48)	0.81 (0.5,1.52)	0.92 (0.65,1.32)	0.89 (0.62,1.26)	0.714664	0.799454	-0.0940539	0.553543	8.45116
343-65-7	Kynurenine	1 (0.79,1.31)	0.92 (0.73,1.24)	0.95 (0.77,1.27)	1.05 (0.85,1.34)	0.729078	0.801986	0.0284215	0.858197	6.81927
4201-62-1	Lactosylceramide(C16:0)	0.99 (0.71,1.48)	1.22 (0.87,1.58)	1.01 (0.72,1.45)	1.09 (0.75,1.42)	0.624416	0.749299	0.0776253	0.625107	8.74376
68171-52-8	Linoleoyl ethanolamide	1 (0.7,1.44)	1.09 (0.81,1.53)	1.22 (0.77,1.82)	1.15 (0.83,1.62)	0.568072	0.721014	-0.163169	0.320951	6.83712
38689-31-5	Leucylleucine	1 (0.6,1.78)	0.88 (0.58,1.39)	1.04 (0.71,1.65)	1.07 (0.66,1.79)	0.464982	0.667148	-0.0631513	0.72273	22.9604
	HODE/EpOME	1 (0.62,1.64)	0.98 (0.62,1.92)	0.96 (0.65,1.57)	0.84 (0.64,1.33)	0.689535	0.784643	-0.00743464	0.965674	5.55788
60-33-3	Linoleic acid	1 (0.66,1.44)	1.93 (1.15,2.94)	0.88 (0.48,1.72)	1.41 (0.9,2.04)	0.0620734	0.227602	0.142494	0.374145	21.3667
17364-16-8	Lysophosphatidylcholine(C16:0)	1 (0.86,1.17)	1.02 (0.77,1.22)	1.04 (0.9,1.2)	1.08 (0.93,1.25)	0.387571	0.628315	-0.141615	0.371005	4.27701
74430-89-0	Lysophosphatidylcholine(C18:0)	1 (0.78,1.29)	0.95 (0.72,1.22)	1.06 (0.8,1.38)	1.15 (0.88,1.41)	0.415984	0.628315	-0.147611	0.35088	19.7838
56-87-1	Lysine	1 (0.93,1.09)	0.91 (0.79,1.08)	1 (0.87,1.1)	1.02 (0.9,1.14)	0.490814	0.669015	0.112454	0.478296	23.635
52691-62-0	Lyso-Platelet activating factor(C16:0)	1 (0.82,1.23)	0.88 (0.72,1.11)	0.99 (0.81,1.31)	0.96 (0.73,1.21)	0.496693	0.669015	-0.220801	0.159968	2.27467
59-51-8	Methionine	1 (0.93,1.08)	0.94 (0.81,1.13)	1.05 (0.92,1.16)	0.96 (0.89,1.09)	0.490086	0.669015	0.11344	0.474423	24.5263
1187-84-4	Methylcysteine	1 (0.61,1.5)	1.14 (0.63,2.9)	1.22 (0.79,2.03)	1.15 (0.7,1.57)	0.670779	0.776692	-0.331982	0.0363649	21.4532
368-16-1	Methylhistidine	1 (0.61,1.64)	0.8 (0.35,1.6)	0.95 (0.5,1.68)	0.53 (0.36,0.87)	0.127285	0.350032	-0.160041	0.317536	3.67538
	Methylxanthine	1 (0.49,2.04)	0.71 (0.31,2.5)	1.47 (0.78,2.71)	1.54 (0.77,2.37)	0.316433	0.572149	0.0181952	0.91127	19.2794
2457-80-9	Methylthioadenosine	1 (0.68,1.46)	1.09 (0.66,1.65)	0.89 (0.68,1.26)	1.78 (1.16,2.4)	0.00231493	0.030557	0.11837	0.472943	13.975	0.00437035	0.936761	0.954407	0.0157625	0.0637844	0.999997
83982-06-3	N-Palmitoyltaurine	1 (0.55,1.54)	0.47 (0.26,1.3)	0.7 (0.46,2.01)	1.71 (1.28,3.17)	0.00870082	0.0691431	0.442585	0.00608806	15.7257	0.147251	0.997729	0.608412	0.103478	0.00982028	0.719949
56353-15-2	N-Acetylcarnosine	1 (0.61,1.56)	0.81 (0.48,1.35)	0.65 (0.42,0.88)	0.68 (0.43,1.1)	0.0887564	0.278949	0.202833	0.265551	7.63996
111-58-0	Oleoyl ethanolamine	1 (0.83,1.24)	1.2 (0.89,1.59)	1.3 (0.97,1.59)	1.65 (1.32,1.91)	0.000676711	0.0148877	0.228851	0.144898	3.73145	0.0867925	0.382613	0.973358	3 x 10-4	0.0660792	0.786595
112-80-1	Oleate	1.03 (0.49,1.81)	1.88 (1.04,3.28)	0.9 (0.42,2.02)	1.68 (1,3)	0.0587588	0.227602	0.202603	0.203944	1.22637
70-26-8	Ornithine	1 (0.7,1.5)	0.9 (0.57,1.58)	1.3 (0.97,1.79)	1.21 (0.75,1.71)	0.308019	0.572149	-0.0559395	0.72494	3.8848
85405-03-4	Platelet activating factor(C4:0)	1 (0.81,1.22)	1.05 (0.75,1.37)	0.99 (0.59,1.3)	0.83 (0.57,1.06)	0.390913	0.628315	-0.118286	0.455624	5.19927
611-59-6	Paraxanthine	1 (0.58,1.71)	0.53 (0.27,1.57)	1.5 (0.71,2.32)	1.19 (0.76,2.09)	0.145083	0.377851	0.102226	0.553001	7.14964
150-30-1	Phenylalanine	1 (0.88,1.12)	0.94 (0.82,1.09)	1.07 (0.93,1.19)	1.16 (1.03,1.31)	0.0107559	0.0691431	0.0836217	0.598541	8.09473	0.566013	0.795929	0.187631	0.105944	0.00884418	0.597133
28047-15-6	Phenylacetylglutamine	1 (0.52,1.87)	0.45 (0.28,0.98)	0.7 (0.44,1.31)	1.08 (0.48,2.08)	0.101397	0.290965	0.105636	0.505535	20.3373
3105-95-1	Pipecolate	1 (0.73,1.27)	0.87 (0.66,1.12)	0.93 (0.7,1.1)	0.78 (0.58,0.91)	0.00855632	0.0691431	-0.299248	0.0542052	8.0742	0.194224	0.545134	0.999971	0.00385979	0.343265	0.634914
94-62-2	Piperine	1.02 (0.39,2.9)	0.51 (0.18,1.5)	0.77 (0.18,2.07)	0.4 (0.19,1.02)	0.267693	0.572149	-0.0551181	0.728825	23.8529
18684-24-7	Prolylhydroxyproline	1 (0.53,1.87)	1.55 (0.81,2.42)	1.16 (0.61,1.95)	0.51 (0.23,1.36)	0.00815631	0.0691431	-0.316077	0.0499653	14.0261	0.118209	0.976629	0.486879	0.254858	0.00475972	0.279412
26993-30-6	Sphingosine-1-phosphate(d18:1)	1 (0.88,1.12)	1.01 (0.84,1.2)	1.18 (0.97,1.36)	1.22 (1.02,1.4)	0.0159093	0.087501	-0.0404966	0.799007	11.5932	0.959006	0.15372	0.272158	0.0388298	0.106401	0.999992
123-78-4	Sphingosine(d18:1)	1 (0.67,1.49)	0.93 (0.55,1.92)	1.23 (0.68,1.83)	1.07 (0.68,1.78)	0.978636	0.983733	-0.0898075	0.586647	7.39455
20290-75-9	Stearidonic acid	1 (0.57,1.4)	0.97 (0.58,1.79)	0.94 (0.63,1.6)	0.93 (0.7,1.44)	0.983733	0.983733	-0.181363	0.25645	1.02493
107-35-7	Taurine	1 (0.73,1.34)	0.85 (0.59,1.15)	1.06 (0.79,1.5)	1.1 (0.88,1.45)	0.0451243	0.198547	0.146051	0.356052	17.724	0.969317	0.950714	0.0964734	0.74337	0.0316089	0.233567
516-50-7	Taurodeoxycholate	1 (0.52,2.06)	1.06 (0.56,3.22)	0.94 (0.39,2.64)	1.43 (0.89,2.95)	0.864707	0.897293	-0.138001	0.383462	8.48453
83-67-0	Theobromine	1 (0.54,1.77)	0.87 (0.48,2.03)	1.43 (0.7,2.38)	1.47 (0.89,2.45)	0.240912	0.567864	0.0823074	0.604321	23.1205
69-93-2	Urate	1 (0.68,1.45)	0.76 (0.52,1.16)	0.92 (0.63,1.33)	1.06 (0.8,1.42)	0.299538	0.572149	0.113358	0.474745	22.6848
58-96-8	Uridine	1 (0.91,1.09)	0.91 (0.76,1.05)	0.93 (0.85,1.04)	1.06 (0.9,1.2)	0.0863534	0.278949	0.202729	0.197883	21.5904
69-89-6	Xanthine	1 (0.71,1.43)	0.96 (0.67,1.17)	1.38 (0.91,1.62)	1.39 (0.97,1.68)	0.0115239	0.0691431	0.107197	0.499231	7.09702	0.930964	0.494024	0.0692278	0.165806	0.0141145	0.579995
