# Supplementary material
Source: HighWire-hosted journal article supplement (https://erj.ersjournals.com/content/49/3/1601740)
Supplement: inline-supplementary-material-3 [file inline-supplementary-material-3.xlsx]

## Sheet: Table_E4
Table E4. Targeted sphingolipid data.
		Fold change (95% CIs)				Univariate		Correlation with inhaled corticosteroid dose		Pairwise Comparisons (Tukey hsd)
CAS-ID	Compound	Control	Mild	Moderate	Severe	p-value	q-value	rho	p-value	Control vs Mild	Control vs Moderate	Control vs Severe	Mild vs Moderate	Mild vs Severe	Moderate vs Severe
26993-30-6	Sphingosine-1-Phosphate(d18:1)	1 (0.85,1.18)	0.94 (0.77,1.11)	1.03 (0.9,1.22)	1.11 (1,1.31)	0.0671548	0.13431	0.0815825	0.598571
19794-97-9	dehydro-Sphingosine-1-P(d18:0)	1 (0.82,1.22)	0.88 (0.77,1.07)	1.05 (0.83,1.3)	1.23 (1.03,1.52)	0.0201485	0.0564158	0.206033	0.179669	0.873532	0.933611	0.0742317	0.596309	0.0274532	0.299218
123-78-4	Sphingosine(d18:1)	1 (0.67,1.41)	1.04 (0.67,1.57)	1.04 (0.73,1.58)	1.32 (0.96,1.93)	0.0528268	0.113781	0.107055	0.489144	0.990902	0.893891	0.048109	0.989929	0.24752	0.275214
764-22-7	dehydro-Sphingosine(d18:0)	0.99 (0.76,1.28)	1.06 (0.66,1.41)	0.99 (0.64,1.37)	1.18 (0.92,1.47)	0.209372	0.293121	0.112774	0.466093
74713-60-3	Ceramide(C12:0)	1 (0.78,1.29)	1 (0.76,1.23)	0.87 (0.61,1.34)	1.14 (0.86,1.71)	0.318629	0.424839	0.264806	0.0823669
123408-74-2	Ceramide(C14:0)	1 (0.84,1.2)	1.03 (0.81,1.25)	0.83 (0.68,1.22)	1.2 (0.93,1.47)	0.135865	0.215198	0.294614	0.05222
24696-26-2	Ceramide(C16:0)	1 (0.85,1.16)	1.2 (0.88,1.37)	1.03 (0.86,1.24)	1.24 (1.06,1.41)	0.0188469	0.0564158	0.311769	0.0393824	0.452866	0.965096	0.0196072	0.720264	0.792472	0.0883595
5966-28-9	Ceramide(C18:1)	1 (0.86,1.18)	1.19 (0.9,1.45)	0.93 (0.76,1.26)	1.35 (1.1,1.66)	0.00184765	0.0117252	0.485889	0.000826886	0.680751	0.932204	0.0146681	0.377201	0.519612	0.00234909
2304-81-6	Ceramide(C18:0)	1 (0.78,1.27)	1.12 (0.85,1.38)	1.21 (0.71,1.55)	1.56 (1.2,2.03)	0.000422161	0.0117252	0.224762	0.142424	0.899599	0.67134	3 x 10-4	0.992821	0.039351	0.0284214
123482-93-9	Ceramide(C20:0)	1 (0.85,1.22)	1.1 (0.91,1.34)	1.2 (0.88,1.47)	1.36 (1.13,1.66)	0.00161731	0.0117252	0.246318	0.107007	0.763516	0.317625	7 x 10-4	0.961469	0.12038	0.191389
27888-44-4	Ceramide(C22:0)	0.99 (0.81,1.2)	1.25 (0.91,1.53)	1.22 (1.02,1.43)	1.41 (1.18,1.73)	0.00209378	0.0117252	0.209702	0.171874	0.311391	0.295691	7 x 10-4	0.996752	0.470676	0.210926
54164-50-0	Ceramide(C24:1)	1 (0.88,1.11)	1.14 (0.85,1.36)	1.01 (0.89,1.21)	1.17 (1.06,1.38)	0.0286661	0.0729682	0.253455	0.0969018	0.591822	0.86075	0.0193912	0.941586	0.658837	0.177915
102917-80-6	Ceramide(C24:0)	1 (0.84,1.17)	1.15 (0.93,1.45)	1.14 (0.94,1.36)	1.34 (1.08,1.67)	0.0425961	0.0993908	0.145036	0.347556	0.635784	0.551401	0.0222904	0.999954	0.639162	0.47469
474923-21-2	Sphingomyelin(C12:0)	0.99 (0.76,1.31)	0.92 (0.73,1.25)	0.89 (0.6,1.35)	1.2 (1,1.6)	0.0883784	0.164973	0.350955	0.0195021
6254-89-3	Sphingomyelin(C16:0)	1 (0.82,1.21)	1.02 (0.88,1.24)	1.05 (0.89,1.26)	1.06 (0.96,1.3)	0.375933	0.438589	0.20392	0.184272
108392-10-5	Sphingomyelin(C18:1)	1 (0.82,1.25)	1.02 (0.82,1.19)	1.19 (0.91,1.49)	1.35 (1.08,1.54)	0.00157735	0.0117252	0.212628	0.165833	0.99938	0.268158	0.00210139	0.49051	0.0226894	0.365698
58909-84-5	Sphingomyelin(C18:0)	1 (0.84,1.2)	0.96 (0.78,1.16)	1.11 (0.89,1.33)	1.28 (1.09,1.46)	0.00574302	0.0268008	0.156027	0.311832	0.993786	0.667901	0.0112096	0.616261	0.0237617	0.253349
94359-13-4	Sphingomyelin(C24:1)	1 (0.82,1.22)	0.93 (0.78,1.23)	1.03 (0.87,1.23)	1.08 (0.92,1.34)	0.407412	0.456301	0.172158	0.263797
60037-60-7	Sphingomyelin(C24:0)	1 (0.87,1.16)	1.11 (0.91,1.66)	1.08 (0.93,1.23)	1.27 (1.04,1.54)	0.138342	0.215198	0.200709	0.191429
	Hexosylceramide(C16:0)	1 (0.88,1.15)	0.88 (0.71,1.05)	1.11 (1,1.28)	0.96 (0.81,1.26)	0.103358	0.180876	-0.070091	0.651195
	Hexosylceramide(C18:1)	1 (0.87,1.12)	0.92 (0.74,1.21)	1.09 (0.95,1.24)	1.02 (0.86,1.19)	0.339507	0.425898	-0.0188082	0.90355
	Hexosylceramide(C18:0)	1 (0.87,1.16)	0.88 (0.69,1.17)	1.29 (1.1,1.58)	1.14 (0.96,1.41)	0.00752311	0.0300924	-0.0904331	0.559359	0.902617	0.0311416	0.454943	0.014669	0.217772	0.522816
	Hexosylceramide(C24:1)	1 (0.76,1.26)	0.87 (0.66,1.05)	1.17 (0.93,1.47)	0.99 (0.75,1.2)	0.011093	0.0388255	-0.110204	0.476378	0.262353	0.335865	0.945683	0.00724522	0.506489	0.109853
474943-80-1	Lactosylceramide(C12:0)	1 (0.6,1.53)	1.1 (0.64,1.58)	1.04 (0.68,1.53)	1.32 (0.75,1.73)	0.957202	0.957202	0.166163	0.281041
4201-62-1	Lactosylceramide(C16:0)	1 (0.8,1.21)	1.04 (0.76,1.27)	1.06 (0.88,1.29)	1.08 (0.91,1.34)	0.648101	0.697955	0.0114201	0.941349
483370-78-1	Lactosylceramide(C24:1)	1 (0.8,1.26)	0.93 (0.68,1.25)	1.09 (0.87,1.33)	0.98 (0.79,1.2)	0.789365	0.8186	-0.0580999	0.707948
105087-85-2	Lactosylceramide(C24:0)	1 (0.84,1.2)	0.94 (0.79,1.14)	1 (0.86,1.2)	1.03 (0.92,1.22)	0.349845	0.425898	0.0899334	0.56154
5966-29-0	dihydroCeramide(C16:0)	1.01 (0.82,1.24)	0.85 (0.69,1.27)	1.08 (0.89,1.3)	1.09 (0.93,1.28)	0.185864	0.273904	-0.0899755	0.561356
